# Supplementary material
Source: PubMed Central journal article supplement (PMC5700320)
Supplement: AAC.01036-17_zac012176692s1.pdf [file AAC.01036-17_zac012176692s1.pdf]

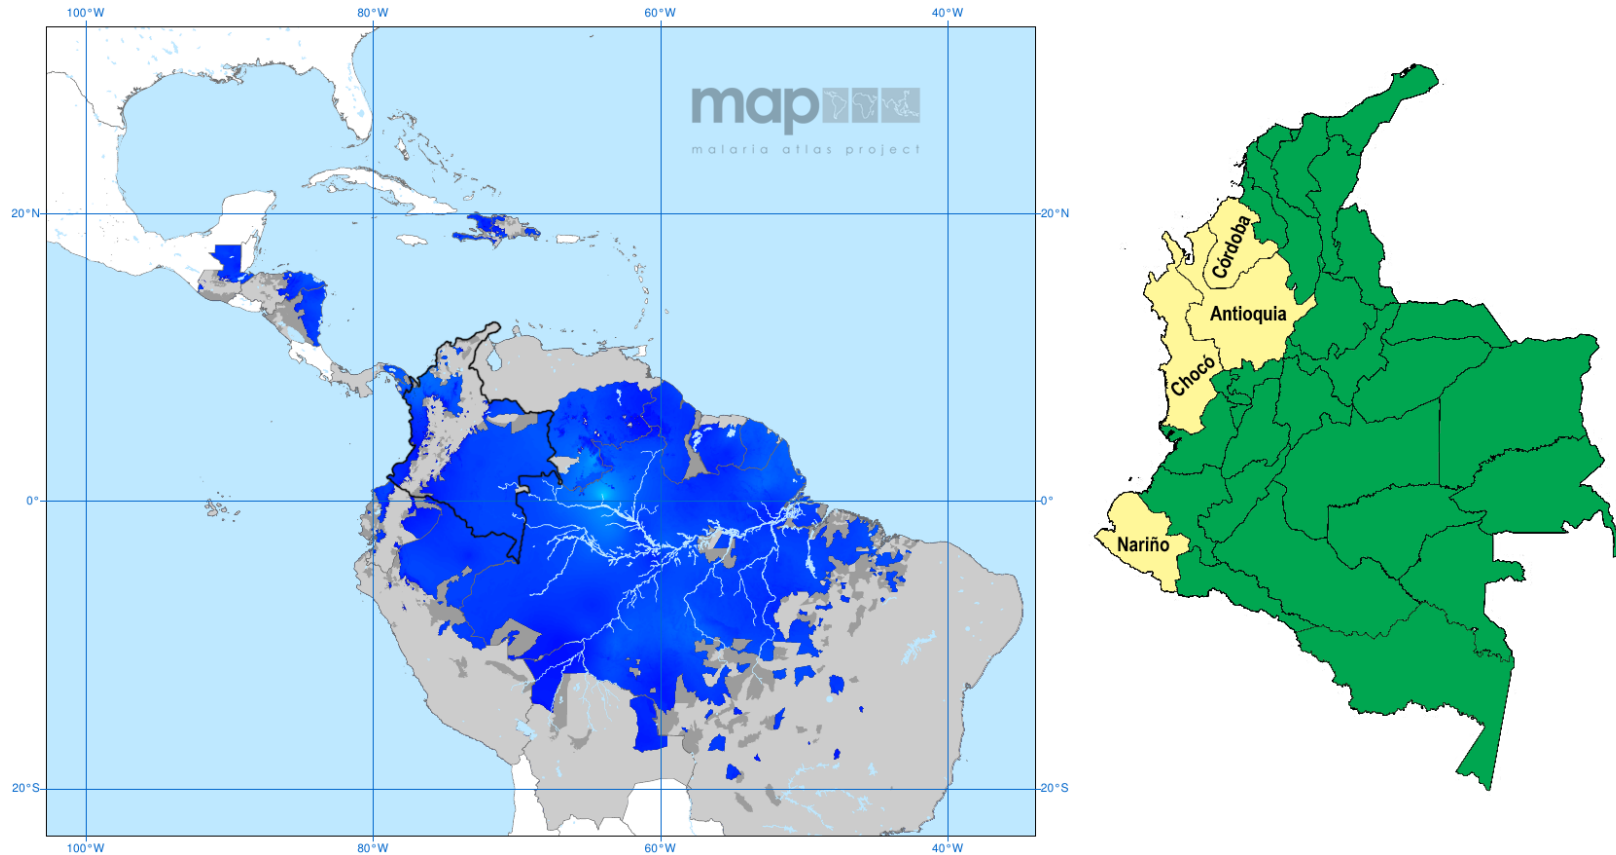

**FIG S1** 2010 *Plasmodium falciparum* endemicity map of Central and South America (1) showing the location of Colombia, and map of Colombia showing the 4 study sites – Córdoba, Antioquia, Chocó, and Nariño – in yellow.

1. Gething PW, Patil AP, Smith DL, Guerra CA, Elyazar IR, Johnston GL, Tatem AJ, Hay SI. 2011. A new world malaria map: *Plasmodium falciparum* endemicity in 2010. *Malar J* 10:378.

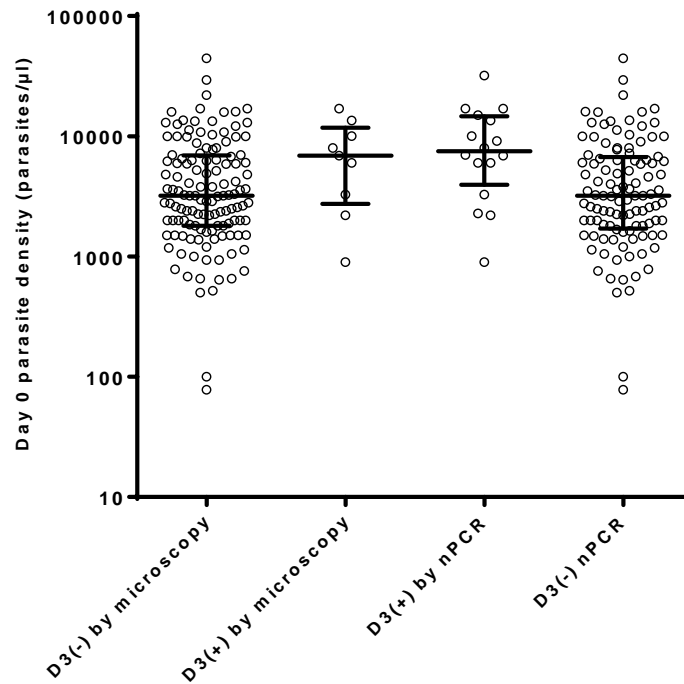

**FIG S2** D0 parasite density, according to D3 microscopy and nPCR results. Initial (D0) parasite density is shown for 4 D3 outcomes: D3 negative by microscopy, D3 positive by microscopy, D3 negative by nPCR and D3 positive by nPCR; Kruskal-Wallis test  $p < 0.05$  for D3-positive and D3-negative samples by nPCR.

## Supplementary tables

**TABLE S1** Antimalarial failure rates in Colombia from 1978 to 2013, as estimated by efficacy studies using the WHO standard protocol

| State                                           | Monotherapy failure rates (%) |             |             |            | Combination therapy failure rates (%) |            |            |            |            |            |            |  | Years     | Ref.   |
|-------------------------------------------------|-------------------------------|-------------|-------------|------------|---------------------------------------|------------|------------|------------|------------|------------|------------|--|-----------|--------|
|                                                 | CQ                            | AQ          | SP          | MQ         | CQ SP                                 | AQ SP      | AL         | AS AQ      | AS MQ      | MQ SP      | AS SP      |  |           |        |
| Antioquia, Chocó, Meta, Magdalena               | 85.0                          |             |             |            |                                       |            |            |            |            |            |            |  | 1978-80   | "(3)   |
| Chocó                                           | 44.0                          |             | 6.0         |            |                                       |            |            |            |            |            |            |  | 1997      | (4)    |
| Nariño, Cauca, Valle del Cauca, Chocó, Amazonas | 78.0                          |             |             |            |                                       |            |            |            |            |            |            |  | 1998-99   | "(3)   |
| Antioquia                                       | 67.0                          | 3.0         | 9.0         |            |                                       |            |            |            |            |            |            |  | 1998      | "(4)   |
| Antioquia                                       | 12.0                          |             | 15.0        |            |                                       |            |            |            |            |            |            |  | 1998      | "(5)   |
| Chocó                                           |                               | 2.8         |             |            |                                       |            |            | 0.0        |            |            |            |  | 2000-04   | "(8)   |
| Antioquia                                       | 82.0                          | 30.0        | 24.0        | 4.0        | 17.0                                  | 2.0        |            |            |            | 0.0        | 3.4        |  | 2000-04   | (9)    |
| Antioquia                                       | 97.0                          | 7.0         | 13.0        |            |                                       |            |            |            |            |            |            |  | 2001      | "(:)   |
| Antioquia                                       | 77.7                          |             | 26.5        |            | 12.1                                  |            |            |            |            |            |            |  | 2002      | "(;)   |
| Antioquia                                       | 87.5                          |             | 22.2        |            | 22.6                                  |            |            |            |            |            |            |  | 2002      | "(: ;) |
| Amazonas                                        |                               | 100.0       | 87.0        |            |                                       |            |            |            |            |            |            |  | 2002-03   | (32) " |
| Córdoba                                         |                               |             |             |            |                                       | 5.7        |            |            |            |            |            |  | 2006      | "(5)   |
| Meta                                            |                               |             |             |            |                                       |            | 0.0        |            |            |            |            |  | 2006      | (33)   |
| Antioquia                                       |                               |             |             |            |                                       |            |            |            | 0.0        |            |            |  | 2007      | (34)   |
| Nariño                                          |                               |             |             |            |                                       |            | 2.5        |            | 1.9        |            |            |  | 2007-08   | (13)   |
| Nariño, Córdoba, Guaviare                       |                               |             |             |            |                                       |            | 0.0        |            |            |            |            |  | 2011-2013 | (14)   |
| <b>Average</b>                                  | <b>70.0</b>                   | <b>24.8</b> | <b>28.1</b> | <b>4.0</b> | <b>17.2</b>                           | <b>3.8</b> | <b>0.8</b> | <b>0.0</b> | <b>0.9</b> | <b>0.0</b> | <b>3.4</b> |  |           |        |
| <b>Std. dev.</b>                                | <b>26.4</b>                   | <b>38.2</b> | <b>26.7</b> | <b>0.0</b> | <b>5.2</b>                            | <b>2.6</b> | <b>1.4</b> | <b>0.0</b> | <b>1.3</b> | <b>0.0</b> | <b>0.0</b> |  |           |        |

CQ, chloroquine; AQ, amodiaquine; SP, sulfadoxine-pyrimethamine; MQ, mefloquine; AL, artemether-lumefantrine; AS, artesunate.

1. Restrepo A AL, Restrepo M. 1980. ESTUDIO IN VIVO DE LA RESISTENCIA DEL P. FALCIPARUM A LA CLOROQUINA EN COLOMBIA, vol Vol. 5
2. Osorio LE, Giraldo LE, Grajales LF, Arriaga AL, Andrade AL, Ruebush TK, Barat LM. 1999. Assessment of therapeutic response of Plasmodium falciparum to chloroquine and sulfadoxine-pyrimethamine in an area of low malaria transmission in Colombia. *Am J Trop Med Hyg* 61:968-72.
3. Castillo CM, Osorio LE, Palma GI. 2002. Assessment of therapeutic response of Plasmodium vivax and Plasmodium falciparum to chloroquine in a Malaria transmission free area in Colombia. *Mem Inst Oswaldo Cruz* 97:559-62.
4. Blair-Trujillo S, Lacharme-Lora L, Carmona-Fonseca J. 2002. Resistance of Plasmodium falciparum to antimalarial drugs in Zaragoza (Antioquia, Colombia), 1998. *Mem Inst Oswaldo Cruz* 97:401-6.
5. Pérez MA, Cortés LJ, Guerra AP, Knudson A, Usta C, Nicholls RS. 2008. [Efficacy of the amodiaquine+sulfadoxine-pyrimethamine combination and of chloroquine for the treatment of malaria in Córdoba, Colombia, 2006]. *Biomedica* 28:148-59.
6. Osorio L, Gonzalez I, Olliaro P, Taylor WR. 2007. Artemisinin-based combination therapy for uncomplicated Plasmodium falciparum malaria in Colombia. *Malar J* 6:25.
7. Blair S, Carmona-Fonseca J, Piñeros J, Ríos A, Alvarez T, Alvarez G, Tobón A. 2006. Therapeutic efficacy test in malaria falciparum in Antioquia, Colombia. *Malar J* 5:14.
8. Blair S, Lacharme LL, Fonseca JC, Tobón A. 2001. [Resistance of Plasmodium falciparum to 3 antimalarials in Turbo (Antioquia, Colombia), 1998]. *Rev Panam Salud Publica* 9:23-9.
9. Blair S, López ML, Piñeros JG, Alvarez T, Tobón A, Carmona J. 2003. [Therapeutic efficacy of 3 treatment protocols for non-complicated Plasmodium falciparum malaria, Antioquia, Colombia, 2002]. *Biomedica* 23:318-27.
10. Osorio L, Pérez LeP, González IJ. 2007. [Assessment of the efficacy of antimalarial drugs in Tarapacá, in the Colombian Amazon basin]. *Biomedica* 27:133-40.
11. Hatz C, Soto J, Nothdurft HD, Zoller T, Weitzel T, Loutan L, Bricaire F, Gay F, Burchard GD, Andriano K, Lefèvre G, De Palacios PI, Genton B. 2008. Treatment of acute uncomplicated falciparum malaria with artemether-lumefantrine in nonimmune populations: a safety, efficacy, and pharmacokinetic study. *Am J Trop Med Hyg* 78:241-7.
12. Vásquez AM, Sanín F, Alvarez LG, Tobón A, Ríos A, Blair S. 2009. [Therapeutic efficacy of a regimen of artesunate-mefloquine-primaquine treatment for Plasmodium falciparum malaria and treatment effects on gametocytic development]. *Biomedica* 29:307-19.
13. Carrasquilla G, Barón C, Monsell EM, Cousin M, Walter V, Lefèvre G, Sander O, Fisher LM. 2012. Randomized, prospective, three-arm study to confirm the auditory safety and efficacy of artemether-lumefantrine in Colombian patients with uncomplicated Plasmodium falciparum malaria. *Am J Trop Med Hyg* 86:75-83.
14. Aponte S, Guerra AP, Alvarez-Larrotta C, Bernal SD, Restrepo C, Gonzalez C, Yasnot MF, Knudson-Ospina A. 2017. Baseline in vivo, ex vivo and molecular responses of Plasmodium falciparum to artemether and lumefantrine in three endemic zones for malaria in Colombia. *Trans R Soc Trop Med Hyg* 111:71-80.

**TABLE S2** Patient follow-up

| <b>State</b> | <b>No. patients enrolled</b> | <b>No. patients followed up on D3</b> | <b>No. patients followed up on D2, D4, D5, or D8</b> | <b>No. patients lost to follow-up</b> |
|--------------|------------------------------|---------------------------------------|------------------------------------------------------|---------------------------------------|
| Chocó        | 103                          | 67                                    | 8                                                    | 28                                    |
| Nariño       | 61                           | 43                                    | 13                                                   | 5                                     |
| Antioquia    | 21                           | 13                                    | 4                                                    | 4                                     |
| Córdoba      | 2                            | 2                                     | 0                                                    | 0                                     |
| <b>Total</b> | <b>187</b>                   | <b>125 (66.8%)</b>                    | <b>25 (13.4%)</b>                                    | <b>37 (19.8%)</b>                     |

**TABLE S3** Patient characteristics

| <b>Characteristic</b>                               | <b>Patients enrolled on D0<br/><i>n</i>=187</b> | <b>Patients followed up on D3<br/><i>n</i>=125</b> |
|-----------------------------------------------------|-------------------------------------------------|----------------------------------------------------|
| Age (years), median (IQR)                           | 26 (18-38.5)                                    | 26 (17-37)                                         |
| Female, no. (%)                                     | 69 (36.9)                                       | 50 (40.0)                                          |
| Occupation, no. (%)                                 |                                                 |                                                    |
| Student                                             | 44 (23.5)                                       | 34 (27.2)                                          |
| Gold miner                                          | 39 (20.9)                                       | 25 (20.0)                                          |
| Housewife                                           | 33 (17.6)                                       | 24 (19.2)                                          |
| Other                                               | 71 (38.0)                                       | 42 (33.6)                                          |
| Parasite density (parasites/ $\mu$ l), median (IQR) | 3,300 (1,840-7,000)                             | 3,400 (1,810-7,940)                                |

**TABLE S4** Patients with asexual or sexual *P. falciparum* parasitemia on D3

| <b>Patient ID</b> | <b>State</b> | <b>Age (years)</b> | <b>Sex</b> | <b>D0 parasite density (parasites/<math>\mu</math>l)</b> | <b>D3 microscopy result*</b>     | <b>D3 nPCR result</b> |
|-------------------|--------------|--------------------|------------|----------------------------------------------------------|----------------------------------|-----------------------|
| <b>05004F</b>     | <b>Chocó</b> | <b>39</b>          | <b>M</b>   | <b>3,278</b>                                             | <b>400 t/<math>\mu</math>l</b>   | <b>Positive</b>       |
| <b>05057F</b>     | <b>Chocó</b> | <b>14</b>          | <b>F</b>   | <b>900</b>                                               | <b>2,120 t/<math>\mu</math>l</b> | <b>Positive</b>       |
| <b>05070F</b>     | <b>Chocó</b> | <b>30</b>          | <b>F</b>   | <b>8,000</b>                                             | <b>40 t/<math>\mu</math>l</b>    | <b>Positive</b>       |
| <b>05096F</b>     | <b>Chocó</b> | <b>40</b>          | <b>M</b>   | <b>6,900</b>                                             | <b>40 t/<math>\mu</math>l</b>    | <b>Positive</b>       |
| 05002F            | Chocó        | 13                 | M          | 10,049                                                   | 520 g/ $\mu$ l                   | Positive              |
| 05003F            | Chocó        | 30                 | M          | 13,544                                                   | 480 g/ $\mu$ l                   | Positive              |
| 05032F            | Chocó        | 57                 | M          | 2,200                                                    | 760 g/ $\mu$ l                   | Positive              |
| 05037F            | Chocó        | 14                 | M          | 6,000                                                    | 180 g/ $\mu$ l                   | Positive              |
| 05053F            | Chocó        | 17                 | F          | 17,000                                                   | 40 g/ $\mu$ l                    | Positive              |

\* t = trophozoites, g = gametocytes

\* “D3-positive” patients with asexual parasitemia by microscopy on D3 are indicated in bold.

**TABLE S5** Genotypes of parasite isolates from nine D3-positive patients

| Patient ID | State | D0 parasite density (parasites/ $\mu$ l) | D3 microscopy result* | D3 nPCR result | <i>K13</i> | <i>Mdr1</i> CN | 86 N/ <u>Y</u> | 184 Y/ <u>E</u> | 1034 S/ <u>C</u> | 1042 N/ <u>D</u> | 1246 D/ <u>Y</u> |
|------------|-------|------------------------------------------|-----------------------|----------------|------------|----------------|----------------|-----------------|------------------|------------------|------------------|
| 05004F     | Chocó | 3,278                                    | 400 t/ $\mu$ l        | Positive       | WT         | 0.944          | N              | <u>F</u>        | S                | <u>D</u>         | <u>Y</u>         |
| 05057F     | Chocó | 900                                      | 2,120 t/ $\mu$ l      | Positive       | WT         | <u>1.806</u>   | N              | <u>F</u>        | S                | <u>D</u>         | <u>Y</u>         |
| 05070F     | Chocó | 8,000                                    | 40 t/ $\mu$ l         | Positive       | WT         | <u>2.023</u>   | N              | <u>F</u>        | S                | <u>D</u>         | D                |
| 05096F     | Chocó | 6,900                                    | 40 t/ $\mu$ l         | Positive       | WT         | 1.279          | N              | <u>F</u>        | S                | <u>D</u>         | **               |
| 05032F     | Chocó | 2,200                                    | 760 g/ $\mu$ l        | Positive       | WT         | 1.148          | N              | <u>F</u>        | S                | <u>D</u>         | D                |
| 05053F     | Chocó | 17,000                                   | 40 g/ $\mu$ l         | Positive       | WT         | 1.031          | N              | <u>F</u>        | S                | <u>D</u>         | <u>Y</u>         |
| 05002F     | Chocó | 10,049                                   | 520 g/ $\mu$ l        | Positive       | WT         | 1.269          | N              | <u>F</u>        | S                | <u>D</u>         | D                |
| 05003F     | Chocó | 13,544                                   | 480 g/ $\mu$ l        | Positive       | WT         | 0.946          | N              | <u>F</u>        | S                | <u>D</u>         | D                |
| 05037F     | Chocó | 6,000                                    | 180 g/ $\mu$ l        | Positive       | WT         | 1.176          | N              | <u>F</u>        | S                | <u>D</u>         | D                |

\* t = trophozoites, g = gametocytes

\*\* missing genotype

Multicopy *mdr1* genotypes and *mdr1* SNPs are underlined and bolded.
